# Supplementary material for: Human Mesenchymal Stem Cells Display Reduced Expression of CD105 after Culture in Serum-Free Medium
Source: Hindawi journal article supplement (doi:10.1155/2013/698076), 2013-01-01
Supplement: f1 [file 698076.f1.zip]

Archive with 2 entries (2 files):
- SM1.pdf
- SM2.pdf
